# Supplementary material for: A Single Amino-Acid Substitution Allows Endo-Polygalacturonase of Fusarium verticillioides to Acquire Recognition by PGIP2 from Phaseolus vulgaris
Source: PubMed Central journal article supplement (PMC3834070; doi:10.1371/journal.pone.0080610), 2013-11-19
Supplement: pone.0080610.s001.pdf [file pone.0080610.s001.pdf]

**Supplemental Table I.** Primers used in this study.

| <b>Primers name</b>      | <b>Sequence</b>                                    |
|--------------------------|----------------------------------------------------|
| <b>PGIP2.Q224K</b><br>Fw | CGGATCAGATAAGAACACGAAGAAGATACATCTGGCGAAG           |
| <b>PGIP2.Q224K</b><br>Rv | CTTCGCCAGA TGTATCTTCTTCGTGTTCTT ATCTGATCCG         |
| <b>PGIP2.Q224E</b><br>Fw | CGGATCAGATAAGAACACGGAGAAGATACATCTGGCGAAG           |
| <b>PGIP2.Q224E</b><br>Rv | CTTCGCCAGA TGTATCTTCTCCGTGTTCTTATCTGATCCG          |
| <b>FvPGEcoFw</b>         | ACCTGAGAATTTCGATCCCTGCTCCGTGAC                     |
| <b>FvPGXbaRv</b>         | GCCTATCTAGACTAGCTGGGGCAAGTGT                       |
| <b>FwFpK116E</b>         | CAGGCGTACTGGGATGGCGAAGGTTCTAACAGCAATAGC            |
| <b>RvFpK116E</b>         | GCTATTGCTGTTAGAACCTTCGCCATCCCAGTACGCCTG            |
| <b>FwFpS120N</b>         | GGATGGCAAAGGTTCTAACACAATAGCAACCAAAAGCCCG           |
| <b>RvFpS120N</b>         | CGGGCTTTTGGTTGCTATTGTTGTTAGAACCTTTGCCATCC          |
| <b>FwFpN121K</b>         | GGCAAAGGTTCTAACAGCAAGAGCAACCAAAAGCCCGATC           |
| <b>RvFpN121K</b>         | GATCGGGCTTTTGGTTGCTCTTGCTGTTAGAACCTTTGCC           |
| <b>FwFpS122D</b>         | GGCAAAGGTTCTAACAGCAATGACAACCAAAAGCCCGATCAC         |
| <b>RvFpS122D</b>         | GTGATCGGGCTTTTGGTTGTCATTGCTGTTAGAACCTTTGCC         |
| <b>FwFpQ124P</b>         | GTTCTAACAGCAATAGCAACCAAAAGCCCGATCACTTCATCG         |
| <b>RvFpQ124P</b>         | CGATGAAGTGATCGGGCTTTGGGTTGCTATTGCTGTTAGAAC         |
| <b>FwFpA274T</b>         | GCATCAAGTCCAACCTCTGGCACAACCTGGCACGATCAACAACG       |
| <b>RvFpA274T</b>         | CGTTGTTGATCGTGCCAGTTGTGCCAGAGTTGGACTTGATGC         |
| <b>FwFpS120N-N121K</b>   | GGGATGGCAAAGGTTCTAACACAAGGACAACCAAAAGCCCGATCA<br>C |
| <b>RvFpS120N-N121K</b>   | GTGATCGGGCTTTTGGTTGTCCTTGTTGTTAGAACCTTTGCCATCCC    |
| <b>FwFpL303E</b>         | GTCGATGTTCAGCAGGACTATGAGAACGGCGGCCCTACTGGAAAG      |
| <b>RvFpL303E</b>         | CTTTCCAGTAGGGCCGCCGTTCTCATAGTCCTGCTGAACATCGAC      |
| <b>FwFpK310T</b>         | CGGCGGCCCTACTGGAACGCCGACCAACGGAGTCAA               |
| <b>RvFpK310T</b>         | TTGACTCCGTTGGTTCGGCGTTCCAGTAGGGCCGCCG              |
| <b>FwFpS363K</b>         | GGTGGTGGCAAGACTAGCAAGTGCAACTATCCTACCAACACT         |
| <b>RvFpS363K</b>         | AGTGTTGGTAGGATAGTTGCACTTGCTAGTCTTGCCACCACC         |
| <b>FwFvT274A</b>         | GCATCAAGTCCAACCTCTGGAGCAACTGGCACGATCAACAACG        |
| <b>RvFvT274A</b>         | CGTTGTTGATCGTGCCAGTTGCTCCAGAGTTGGACTTGATGC         |
| <b>FwFvL303E</b>         | GTCGATGTCCAGCAAGATTATGAGAACGGCGGTCCTACTGGAAAG      |
| <b>RvFvL303E</b>         | CTTTCCAGTAGGACCGCCGTTCTCATAATCTTGCTGGACATCGAC      |
