# Supplementary material for: A Single Amino-Acid Substitution Allows Endo-Polygalacturonase of Fusarium verticillioides to Acquire Recognition by PGIP2 from Phaseolus vulgaris
Source: PubMed Central journal article supplement (PMC3834070; doi:10.1371/journal.pone.0080610), 2013-11-19
Supplement: pone.0080610.s002.pdf [file pone.0080610.s002.pdf]

**Supplemental Table II.** Summary of the low resolution structural data obtained from SAXS analysis of the CluPG1-PvPGIP2 complex. Radius of gyration ( $R_g$ ), maximum size of the particle ( $D_{max}$ ), estimated volume, radius of gyration obtained with SASREF ( $R_{gs}$ ), mean  $\chi$  obtained with GA\_STRUCT and SASREF, respectively ( $\chi_G$  and  $\chi_s$ ) are reported. \*Data for the FpPG-PvPGIP2 complex are taken from Reference 30 and are reported for comparison.

| Sample         | $R_g$ (Å)      | $D_{max}$ (Å) | Volume (nm <sup>3</sup> ) | $R_{gs}$ (Å) | $\langle\chi_G\rangle$ | $\langle\chi_s\rangle$ |
|----------------|----------------|---------------|---------------------------|--------------|------------------------|------------------------|
| CluPG1-PvPGIP2 | $28.5 \pm 0.4$ | $84 \pm 2$    | $109 \pm 4$               | 28.8         | $0.203 \pm 0.009$      | $0.49 \pm 0.04$        |
| *FpPG-PvPGIP2  | $28.6 \pm 0.4$ | $80 \pm 5$    | $114 \pm 6$               | 28.3         | $0.416 \pm 0.033$      | $0.76 \pm 0.02$        |
