# Supplementary material for: A Single Amino-Acid Substitution Allows Endo-Polygalacturonase of Fusarium verticillioides to Acquire Recognition by PGIP2 from Phaseolus vulgaris
Source: PubMed Central journal article supplement (PMC3834070; doi:10.1371/journal.pone.0080610), 2013-11-19
Supplement: pone.0080610.s003.pdf [file pone.0080610.s003.pdf]

**Supplemental Figure 1.**

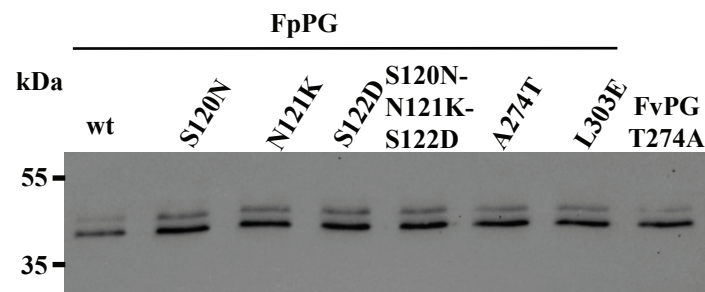

**Supplemental Figure 1.** Western blot analysis using a polyclonal antibody against the FpPG, on the mutated and wild-type forms of FpPG and FvPG producing an equal enzymatic activity on the agar diffusion assay.
